# Supplementary material
Source: PubMed Central journal article supplement (PMC8919332)
Supplement: joces-135-259046-s1.pdf [file joces-135-259046-s1.pdf]

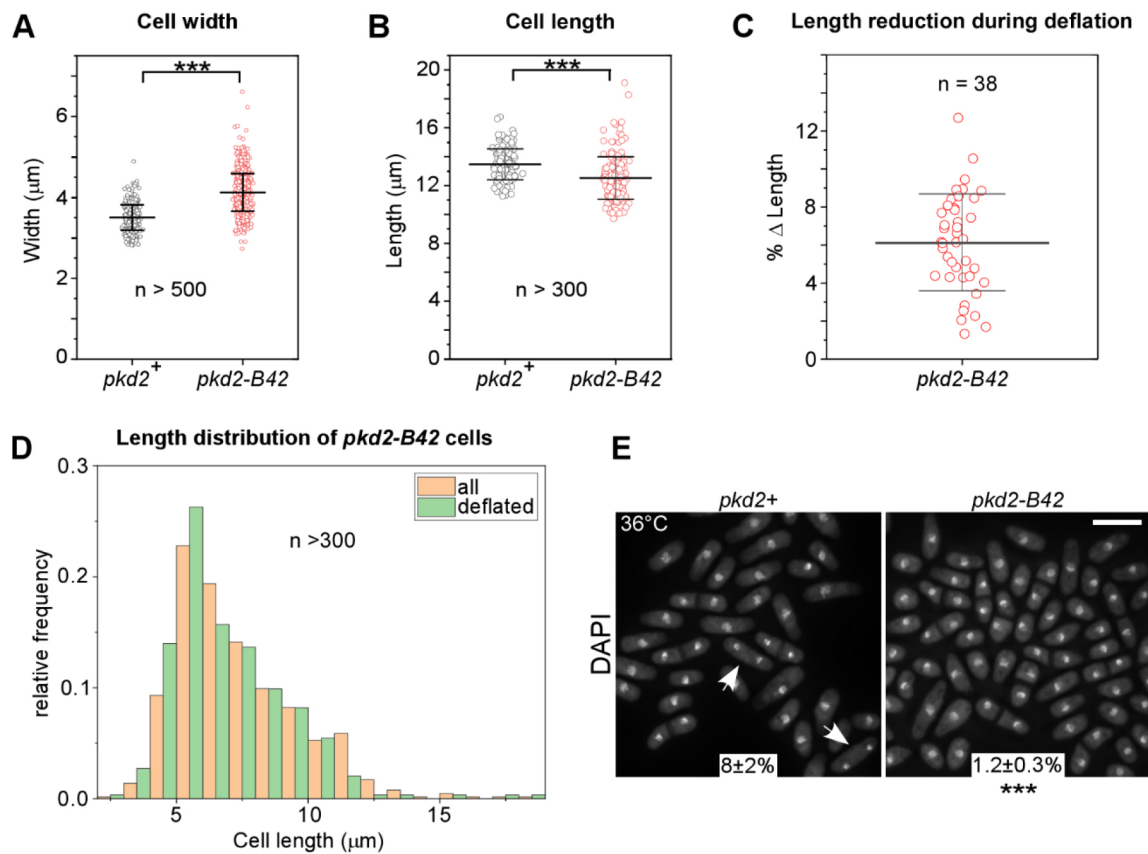

**Fig. S1. Morphogenesis of the temperature-sensitive mutant *pkd2-B42*. Related to Figure 1 and 2.**

(A–B) Dot plots of the width (A) and length (B) of *pkd2-B42* cells at 36°C, compared to the wild-type (*pkd2+*)  $n > 500$  and  $n > 300$  respectively. Lines and error bar represents average  $\pm$  standard deviations (C) Dot plot showing reduction in cell length during deflation of *pkd2-B42* cells  $n = 38$ . (D) Histogram showing cell length distribution of *pkd2-B42* cells. Green: deflated *pkd2* mutant cells. Orange: all *pkd2-b42* cells.  $n > 300$ . (E) Fluorescence micrographs of either wild-type (left) and *pkd2-B42* (right) cells at 36°C, fixed and stained with DAPI. Arrow: mitotic cell with condensed nuclei. Number: percentage of mitotic cells (average  $\pm$  standard deviations,  $n > 500$ ). The data were pooled from at least two independent biological repeats. Scale bar represents 10  $\mu\text{m}$ . \*\*\*:  $P < 0.001$  (Two-tailed student t-test).

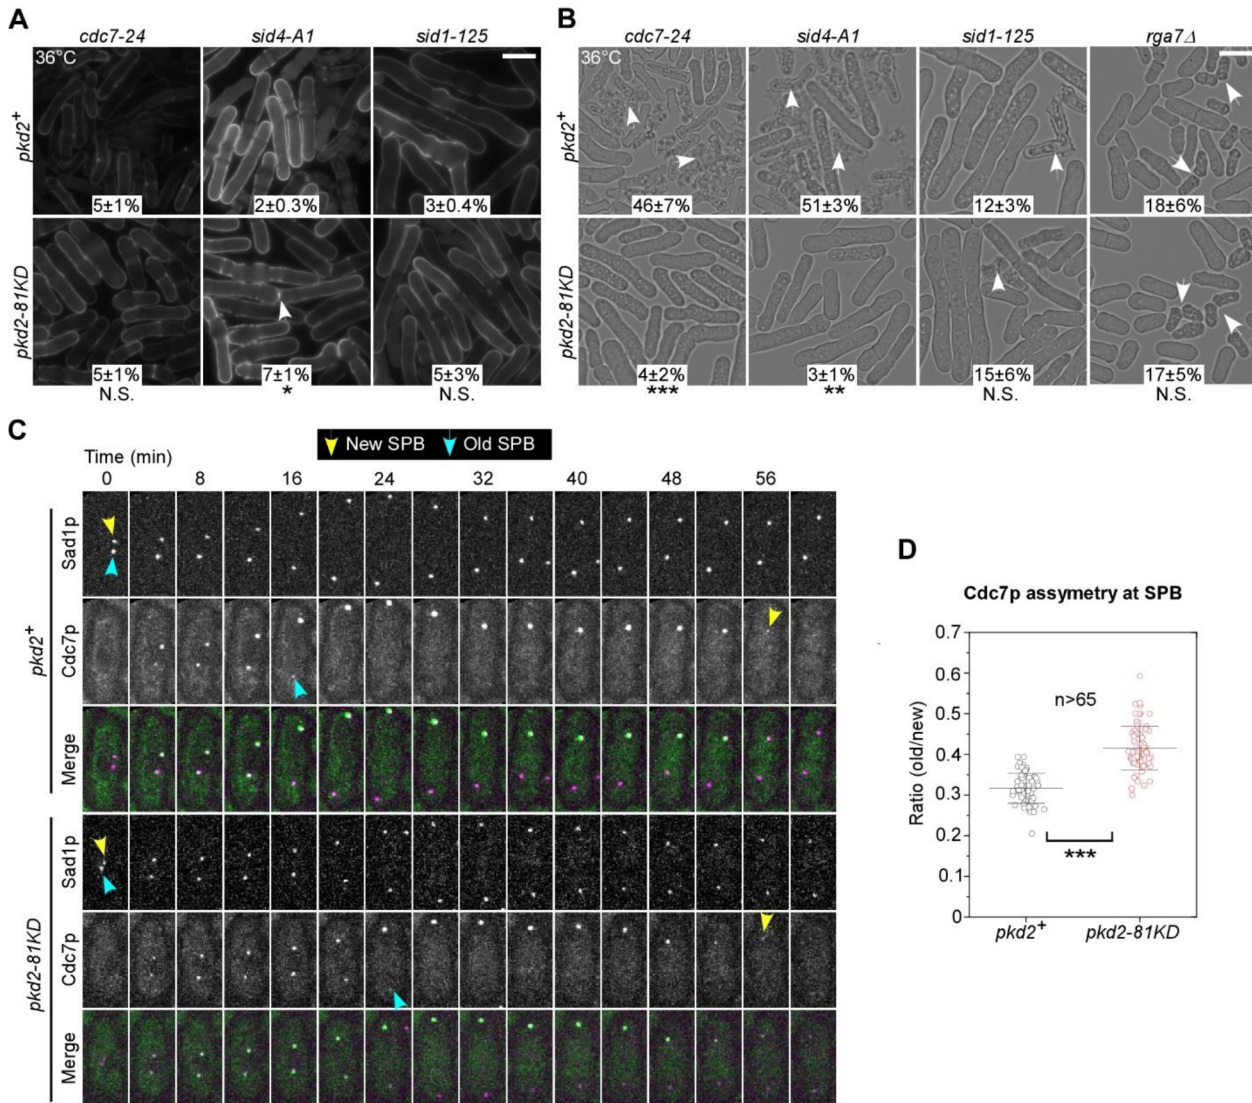

**Fig. S2. SIN activities in *pkd2* mutant cells. Related to Figure 6**

(A–B) Micrographs of fixed SIN (top), SIN *pkd2-81KD* (bottom), *rga7Δ* (top) *rga7Δ pkd2-81KD* (bottom) cells at 36°C. (A) Calcofluor stained cells. Arrow: septated cell. (B) Arrow: lysed cell. Number: percentages of either septated (A) or lysed cells (B) (average ± standard deviation, n > 400). (C–D) Asymmetric distribution of Cdc7p-GFP at two SPBs during cell division. (C) Time-lapse micrographs of either a wild-type or a *pkd2-81KD* expressing both Cdc7p-GFP and SPB marker Sad1-mCherry. Number represents time in mins after the SPB separation. Arrow: new (yellow) or old (blue) SPB. (D) Dot plots of ratio (old:new) of the dwelling time of Cdc7p-GFP at the two SPBs, n > 65. Lines and error bar represents average ± standard. The data were pooled from at least two independent biological repeats. Scale bar represents 10 μm. \*:P<0.05, \*\*:P<0.01, \*\*\*: P<0.001, NS: Not significant (Two-tailed student t-test).

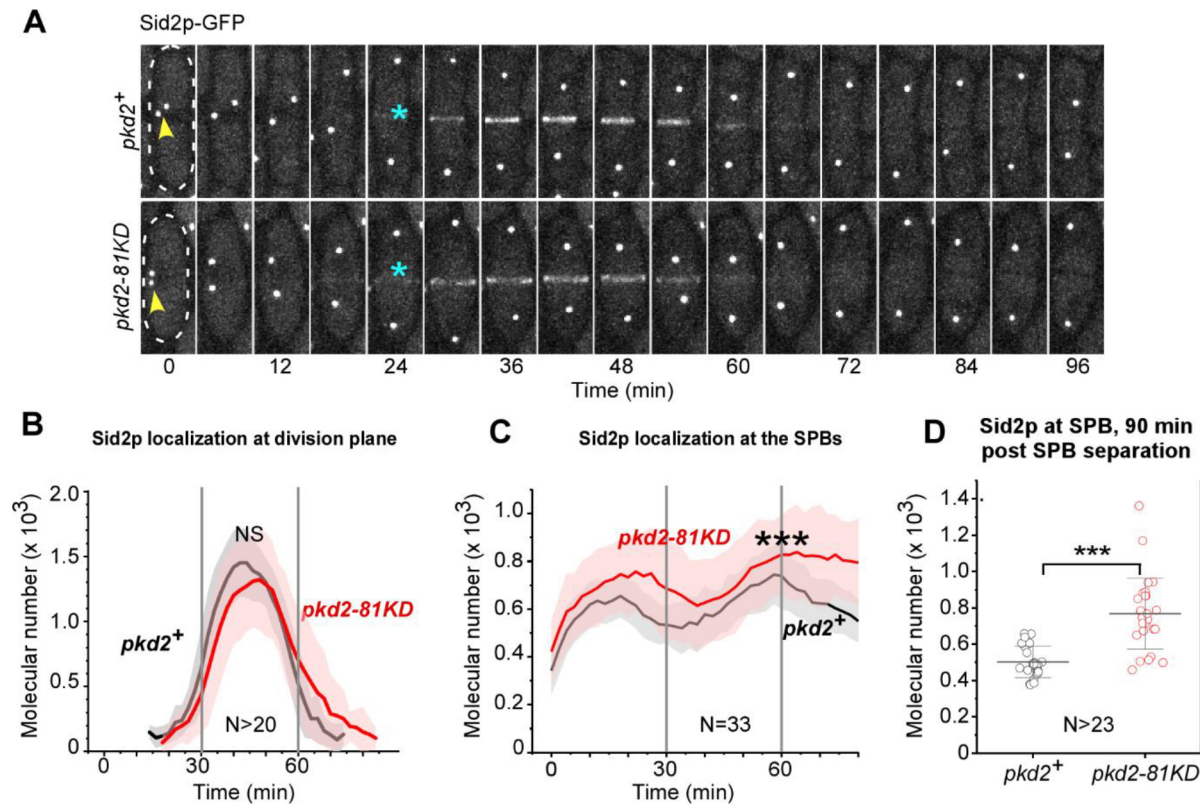

**Fig. S3. SIN protein localization in *pkd2-81KD* cells during cytokinesis. Related to Figure 7**

(A) Time-lapse micrographs of either a wild-type (top) or a *pkd2* mutant (bottom) cell expressing Sid2p-GFP. Number: time in mins after SPB separation. Interval = 6 min. Arrowhead: SPB. Asterisk: appearance of Sid2p-GFP at the division plane. (B–C) Average time-courses of the number of Sid2p-GFP molecules in the (B) division plane or (C) SPBs of either wild-type (black line) or the *pkd2-81KD* cells (red line),  $n > 20$  and  $n = 33$  for (B) and (C) respectively. Cloud represents standard deviation. (D) Dot plot showing number of Sid2 molecules at 90 min after SPB separation in wild-type or the *pkd2-81KD* cells (red line),  $n > 23$ . Lines and error bar represents average  $\pm$  standard deviation. The data was pooled from two independent biological repeats. \*\*\*:  $P < 0.001$ , NS: Not significant (Two-tailed student t-test).

**Table S1. List of the missense mutations identified in *pkd2-B42***

| Residue | Position in the transmembrane helices       | Mutation | Amino acid change                     |
|---------|---------------------------------------------|----------|---------------------------------------|
| 335     | 3rd                                         | F → S    | Hydrophobic to Polar Uncharged        |
| 408     | 5 <sup>th</sup>                             | S → P    | Polar Uncharged to Polar Uncharged    |
| 521     | Between 7 <sup>th</sup> and 8 <sup>th</sup> | N → D    | Polar Uncharged to Negatively Charged |
| 530     | 8 <sup>th</sup>                             | M → V    | Hydrophobic to Hydrophobic            |
| 534     | 8 <sup>th</sup>                             | S → G    | Polar Uncharged to Hydrophobic        |
| 543     | 8 <sup>th</sup>                             | Q → E    | Polar Uncharged to Negatively Charged |
| 555     | 9 <sup>th</sup>                             | I → T    | Hydrophobic to Polar Uncharged        |
| 571     | 9 <sup>th</sup>                             | I → T    | Hydrophobic to Polar Uncharged        |

**Table S2. Young's Elasticity Modulus of cellular turgor pressure from Hertz modeling**

|                                  | 26°C         |                  |                 | 37°C         |                      |                     |
|----------------------------------|--------------|------------------|-----------------|--------------|----------------------|---------------------|
|                                  | <i>pkd2+</i> | <i>pkd2-81KD</i> | <i>pkd2-B42</i> | <i>pkd2+</i> | <i>pkd2-B42 (ND)</i> | <i>pkd2-B42 (D)</i> |
| Young's Elasticity Modulus (MPa) | 1.3 ± 0.4    | 0.6 ± 0.3        | 0.6 ± 0.3       | 1.2 ± 0.4    | 0.6 ± 0.3            | 0.3 ± 0.2           |

Note: n > 5 cells evaluated for each condition

Abbreviations: MPa, Megapascal. ND, not deflated. D, deflated.

**Table S3. Genetic interactions between *pkd2-81KD* and other cytokinetic mutants**

| Gene         | Mutant            | Genetic interactions |
|--------------|-------------------|----------------------|
| <i>ace2</i>  | <i>ace2Δ</i>      | -                    |
| <i>agn1</i>  | <i>agn1Δ</i>      | No                   |
| <i>ags1</i>  | <i>mok1-664</i>   | No                   |
| <i>bgs4</i>  | <i>cwg1-2</i>     | No                   |
| <i>cdc11</i> | <i>cdc11-123</i>  | No                   |
| <i>cdc14</i> | <i>cdc14-118</i>  | ++                   |
| <i>cdc16</i> | <i>cdc16-116</i>  | --                   |
| <i>cdc42</i> | <i>cdc42-1625</i> | No                   |
| <i>cdc7</i>  | <i>cdc7-24</i>    | No                   |
| <i>eng1</i>  | <i>eng1Δ</i>      | No                   |
| <i>exo70</i> | <i>exo70Δ</i>     | -                    |
| <i>mid1</i>  | <i>mid1Δ</i>      | No                   |
| <i>mid2</i>  | <i>mid2Δ</i>      | No                   |
| <i>mor2</i>  | <i>mor-282</i>    | --                   |
| <i>myp2</i>  | <i>myp2Δ</i>      | No                   |
| <i>orb6</i>  | <i>orb6-25</i>    | --                   |
| <i>rga7</i>  | <i>rga7Δ</i>      | No                   |
| <i>rgf1</i>  | <i>rgf1Δ</i>      | No                   |
| <i>rgf2</i>  | <i>rgf2Δ</i>      | No                   |
| <i>sid1</i>  | <i>sid1-125</i>   | No                   |
| <i>sid4</i>  | <i>sid4-A1</i>    | +                    |
| <i>spg1</i>  | <i>spg1-106</i>   | ++                   |
| <i>sty1</i>  | <i>sty1Δ</i>      | No                   |

“++” or “+”: strong or weak positive interactions. “--” or “- “: strong or weak negative interactions. No: no interactions. Genetic interactions with the other 11 cytokinesis mutants were published in an earlier study (Morris et al., 2019).

**Table S4. List of the primers used in the screen for *pkd2-B42***

| <b>Number</b> | <b>Sequence</b>                                                                                               |
|---------------|---------------------------------------------------------------------------------------------------------------|
| QC-P596       | <i>AGAGTCGAATTTTATTGATG</i>                                                                                   |
| QC-P597       | <i>ATGCCGCATAGTTAAGCCAG</i>                                                                                   |
| QC-P598       | <i>GTCGTTCTTTTCCTGACATA</i>                                                                                   |
| QC-P599       | <i>TATGTCAGGAAAAGAACGAC</i>                                                                                   |
| QC-P600       | <i>CTGAAGTCCCAAGCACGAAG</i>                                                                                   |
| QC-P601       | <i>CTTCGTGCTTGGGACTTCAG</i>                                                                                   |
| QC-P602       | <i>ACGTTTATTAACATTTTATTGAAACAATCTATAGACACCGGTAAGAATAAATCCATAAGCCA<br/>TTCCCAA-<i>GGAAATAGTAAGGCTAGTAG</i></i> |
| QC-P603       | <i>GAATATATGCCTATTCGCAATCTAGAATTCCTTTGAATACACCCAATTACAAGCTTAAACGA<br/>TTCGGTAT-TAAAAATAGGCGTATCACGAGG</i>     |
| QC-P604       | <i>AGCATATTTGTTGGATGTGC</i>                                                                                   |
| QC-P605       | <i>AA-CGATCG-ATGAGGCTTGGAGAAGCCCAC</i>                                                                        |
| QC-P606       | <i>AA-GGATCC-TTTGGGAATGGCTTATGGATTTATTC</i>                                                                   |
| QC-P607       | <i>GACGAAGCTCTTTCTAGAAGCGTAGT</i>                                                                             |

**Table S5. List of fission yeast strains**

| Strains number | Genotype  |                                                               | Source                |
|----------------|-----------|---------------------------------------------------------------|-----------------------|
| FY13846        | <i>h-</i> | <i>cps212-282 or mor2-282</i>                                 | (CP28-2) NBRP Japan   |
| FY38515        | <i>h-</i> | <i>his5+::pact1:CRIB[gic2aa1-181]-3mCherry:bsdMX</i>          | (AV2324) NBRP Japan   |
| FY527          | <i>h-</i> | <i>leu1-32 ura4-D18 his3-D1 ade6-M216</i>                     | Lab stock             |
| FY528          | <i>h+</i> | <i>leu1-32 ura4-D18 his3-D1 ade6-M210</i>                     | Lab stock             |
| JW7551         | <i>h?</i> | <i>cwg1-2 leu1-32</i>                                         | Jian Wu               |
| JW7572         | <i>h-</i> | <i>mok1-664 leu1-32 ura4-D18</i>                              | Jian Wu               |
| MBY6218        | <i>h-</i> | <i>ade5D ade7::Ade5 his5D leu1-32 ura4D-18</i>                | Mohan Balasubramanian |
| PPG5660        | <i>h+</i> | <i>leu1-32 ura4-D18 cdc42-1425::kanMX6</i>                    | Pilar Perez           |
| QC-Y569        | <i>h-</i> | <i>cdc11-123 ura4-D18</i>                                     | Lab stock             |
| QC-Y570        | <i>h-</i> | <i>sid4-A1 ura4-D18 leu1-32</i>                               | Lab stock             |
| QC-Y571        | <i>h+</i> | <i>spg1-106 ura4-D18 leu1-32 ade-210</i>                      | Lab stock             |
| QC-Y573        | <i>h+</i> | <i>cdc16-116 ura4-D18 leu1-32 ade-M210</i>                    | Lab stock             |
| QC-Y574        | <i>h-</i> | <i>cdc7-24 ura4-D18 leu1-32 ade-M21X</i>                      | Lab stock             |
| QC-Y576        | <i>h+</i> | <i>sid2-250 ura4-D18 ade-M21X leu1-32</i>                     | Lab stock             |
| QC-Y577        | <i>h-</i> | <i>mob1-R4 leu1+ ura4-D18</i>                                 | Lab stock             |
| QC-Y624        | <i>h+</i> | <i>cdc14-118 ura4-D18 ade-216</i>                             | Lab stock             |
| QC-Y670        | <i>h-</i> | <i>myp2::kanMX6 leu1-32 ura4-D18</i>                          | Lab stock             |
| QC-Y675        | <i>h-</i> | <i>mob1-mEGFP-kanMX6</i>                                      | Lab stock             |
| QC-Y676        | <i>h-</i> | <i>sid2-mEGFP-kanMX6</i>                                      | Lab stock             |
| QC-Y723        | <i>h+</i> | <i>sid1-125 ura4-D18 leu1-32 ade6-210</i>                     | Lab stock             |
| QC-Y725        | <i>h+</i> | <i>ace2::kanR ura4-D18 ade6-216 leu1-32 h+</i>                | Lab stock             |
| QC-Y743        | <i>h+</i> | <i>far8::kanMX6 ade-M216 ura4-D18 leu1-32</i>                 | Bioneer               |
| QC-Y803        | <i>h-</i> | <i>orb6-25 leu1-32 ade-M21X</i>                               | Lab stock             |
| QC-Y810        | <i>h-</i> | <i>KanMX6-P81nmt1-pkd2 leu1-32 ura4-D18 his3-D1 ade6-M21X</i> | Lab stock             |
| QC-Y817        | <i>h+</i> | <i>kanMX6-81xnmt1-pkd2 leu1-32 ura4-D18 his3-D1 ade6-M21X</i> | Lab stock             |
| QC-Y825        | <i>h-</i> | <i>kanMX6-81xnmt1-Pkd2 sid2-250 ura4-D18 ade-M21X leu1-32</i> | Lab stock             |
| QC-Y874        | <i>h-</i> | <i>styl1::kanMX6</i>                                          | Lab stock             |
| QC-Y930        | <i>h?</i> | <i>kanMX6-81xnmt1-Pkd2 sid2-mEGFP-kanMX6</i>                  | This study            |

|          |           |                                                                        |            |
|----------|-----------|------------------------------------------------------------------------|------------|
| QC-Y933  | <i>h?</i> | <i>kanMX6-81xnmt1-Pkd2 mob1-mEGFP-kanMX6</i>                           | This study |
| QC-Y976  | <i>h?</i> | <i>kanMX6-81xnmt1-pkd2 cdc16-116 ura4-D18 leu1-32 his3-D1 ade-M210</i> | This study |
| QC-Y977  | <i>h?</i> | <i>kanMX6-81xnmt1-pkd2 cdc14-118 ura4-D18 leu1-32 his3-D1 ade-216</i>  | This study |
| QC-Y978  | <i>h?</i> | <i>kanMX6-81xnmt1-pkd2 cdc11-123 ura4-D18</i>                          | This study |
| QC-Y979  | <i>h?</i> | <i>kanMX6-81xnmt1-pkd2 spg1-106 ura4-D18 leu1-32</i>                   | This study |
| QC-Y980  | <i>h?</i> | <i>kanMX6-81xnmt1-pkd2 sid4-A1 ura4-D18 leu1-32</i>                    | This study |
| QC-Y983  | <i>h?</i> | <i>kanMX6-81xnmt1-pkd2 cdc7-24 ura4-D18 leu1-32 ade-M21X</i>           | This study |
| QC-Y999  | <i>h-</i> | <i>pkd2-3'UTR-his5CterD-ura4</i>                                       | This study |
| QC-Y1010 | <i>h+</i> | <i>mid1::kanMX6 ade-M216 ura4-D18 leu1-32</i>                          | Bioneer    |
| QC-Y1011 | <i>h+</i> | <i>mid2::kanMX6 ade-M216 ura4-D18 leu1-32</i>                          | Bioneer    |
| QC-Y1012 | <i>h+</i> | <i>rga7::kanMX6 ade-M216 ura4-D18 leu1-32</i>                          | Bioneer    |
| QC-Y1013 | <i>h+</i> | <i>rgf1::kanMX6 ade-M216 ura4-D18 leu1-32</i>                          | Bioneer    |
| QC-Y1017 | <i>h?</i> | <i>kanMX6-81xnmt1-pkd2 myp2::kanMX6 ade-M21X ura4-D18 leu1-32</i>      | This study |
| QC-Y1022 | <i>h?</i> | <i>kanMX6-81xnmt1-pkd2 mid1::kanMX6 ade-M21X ura4-D18 leu1-32</i>      | This study |
| QC-Y1023 | <i>h?</i> | <i>kanMX6-81xnmt1-pkd2 mid2::kanMX6 ade-M21X ura4-D18 leu1-32</i>      | This study |
| QC-Y1024 | <i>h?</i> | <i>kanMX6-81xnmt1-pkd2 rga7::kanMX6 ade-M21X ura4-D18 leu1-32</i>      | This study |
| QC-Y1025 | <i>h?</i> | <i>kanMX6-81xnmt1-pkd2 rgf1::kanMX6 ade-M21X ura4-D18 leu1-32</i>      | This study |
| QC-Y1031 | <i>h-</i> | <i>pkd2::pkd2-B42-ura4+-his5+ leu1-32</i>                              | This study |
| QC-Y1032 | <i>h+</i> | <i>pkd2::pkd2-B42-ura4+-hist5+ leu1-32</i>                             | This study |
| QC-Y1032 | <i>h+</i> | <i>pkd2::pkd2-B42-ura4+-hist5+ leu1-32</i>                             | This study |
| QC-Y1036 | <i>h?</i> | <i>pkd2::pkd2-B42-ura4+-his5+ leu1-32 ade-M21X sid2-250</i>            | This study |
| QC-Y1037 | <i>h?</i> | <i>pkd2::pkd2-B42-ura4+-his5+ mob1-R4 leu1+</i>                        | This study |
| QC-Y1061 | <i>h+</i> | <i>eng1:: KanMx6 ade-M216 ura4-D18 leu1-32</i>                         | Bioneer    |
| QC-Y1062 | <i>h+</i> | <i>rgf2::kanMX6 ade-M21X ura4-D18 leu1-32</i>                          | Bioneer    |
| QC-Y1070 | <i>h-</i> | <i>ura4::Pact-sfGFP-ura4 leu1-32 his3-D1 ade6-M216</i>                 | This study |
| QC-Y1072 | <i>h?</i> | <i>pkd2::pkd2-B42-ura4+-his5+ leu1-32 far8::kanMX6</i>                 | This study |
| QC-Y1073 | <i>h?</i> | <i>kanMX6-81xnmt1-pkd2 far8::kanMX6 ade-M216 ura4-D18 leu1-32</i>      | This study |
| QC-Y1081 | <i>h?</i> | <i>eng1:: KanMx6 pkd2::pkd2-B42-ura4+-his5+ leu1-32</i>                | This study |
| QC-Y1082 | <i>h?</i> | <i>rgf2:: KanMx6 pkd2::pkd2-B42-ura4+-his5+ leu1-32</i>                | This study |
| QC-Y1085 | <i>h?</i> | <i>eng1:: KanMx6 kanMX6-81xnmt1-pkd2 ade-M21X ura4-D18 leu1-32</i>     | This study |



|          |           |                                                                                        |            |
|----------|-----------|----------------------------------------------------------------------------------------|------------|
| QC-Y1093 | <i>h?</i> | <i>pkd2::pkd2-B42-ura4+-his5+ leu1-32 mok1-664</i>                                     | This study |
| QC-Y1096 | <i>h?</i> | <i>mok1-664 KanMX6-81xnmt1-pkd2 leu1-32 ura4-D18</i>                                   | This study |
| QC-Y1108 | <i>h?</i> | <i>cwg1-2 pkd2::pkd2-B42-ura4+-his5+ leu1-32</i>                                       | This study |
| QC-Y1109 | <i>h?</i> | <i>cwg1-2 leu1-32 kanMX6-81xnmt1-pkd2</i>                                              | This study |
| QC-Y1162 | <i>h+</i> | <i>agn1::kanMX6 ade-M216 ura4-D18 leu1-32</i>                                          | Bioneer    |
| QC-Y1168 | <i>h?</i> | <i>KanMX6-81xnmt1-pkd2 sid1-125 ura4-D18 leu1-32 ade6-210</i>                          | This study |
| QC-Y1178 | <i>h?</i> | <i>KanMX6-81xnmt1-pkd2 ace2::kanR</i>                                                  | This study |
| QC-Y1181 | <i>h?</i> | <i>agn1::kanMX6 pkd2::pkd2-B42-ura4+-his5+ leu1-32</i>                                 | This study |
| QC-Y1190 | <i>h?</i> | <i>agn1::kanMX6 kanMX6-81xnmt1 pkd2 ura4-D18 leu1-32 ade6-210</i>                      | This study |
| QC-Y1198 | <i>h?</i> | <i>orb6-25 pkd2::pkd2-B42-ura4+-his5+ leu1-32 ade-M21X</i>                             | This study |
| QC-Y1227 | <i>h?</i> | <i>pkd2::pkd2-B42-ura4+-his5+ leu1-32 his5+:pact1:CRIB[gic2aal-181]-3mCherry:bsdMX</i> | This study |
| QC-Y1233 | <i>h?</i> | <i>ura4::Pact1-pkd2-sfGFP-ura4+ orb6-25 leu1-32 ade-M21X</i>                           | This study |
| QC-Y1250 | <i>h+</i> | <i>mor2-282 (cps12-282) pkd2::pkd2-B42-ura4+-his5+ leu1-32</i>                         | This study |
| QC-Y1254 | <i>h?</i> | <i>exo70Δ::kanMX6</i>                                                                  | This study |
| QC-Y1256 | <i>h?</i> | <i>pkd2::pkd2-B42-ura4+-his5+ leu1-32 exo70Δ::kanMX6</i>                               | This study |
| QC-Y1274 | <i>h?</i> | <i>pkd2::pkd2-B42-ura4+-his5+ leu1-32 ade-M21X spg1-106</i>                            | This study |
| QC-Y1307 | <i>h?</i> | <i>cdc42-1625 pkd2::pkd2-B42-ura4+-his5+ leu1-32</i>                                   | This study |
| QC-Y1317 | <i>h?</i> | <i>pkd2::pkd2-B42-ura4+-his5+ leu1-32 ura4::Pact-sfGFP-ura4</i>                        | This study |
| QC-Y1352 | <i>h?</i> | <i>sty1::kanMX6 pkd2::pkd2-B42-ura4+-his5+ leu1-32</i>                                 | This study |
| QC-Y1408 | <i>h?</i> | <i>cdc7-GFP::ura4 Sad1-mCherry-NatMX6</i>                                              | This study |
| QC-Y1409 | <i>h?</i> | <i>kanMX6-81xnmt1-pkd2 leu1-32 cdc7-GFP::ura4 Sad1-mCherry-NatMX6</i>                  | This study |

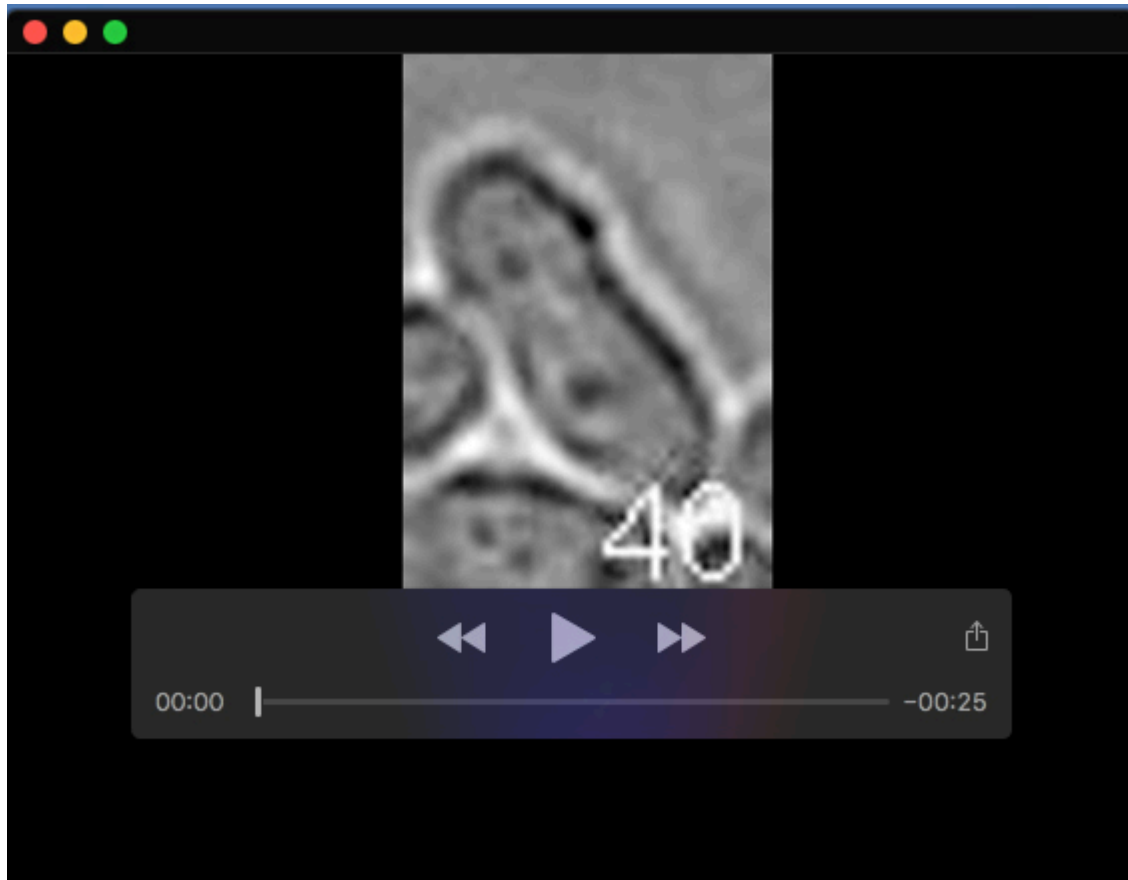

**Movie 1.** Time-lapse series of a expanding wild-type cell at 37°C. Number represents time in minutes after the preceding cell separation.

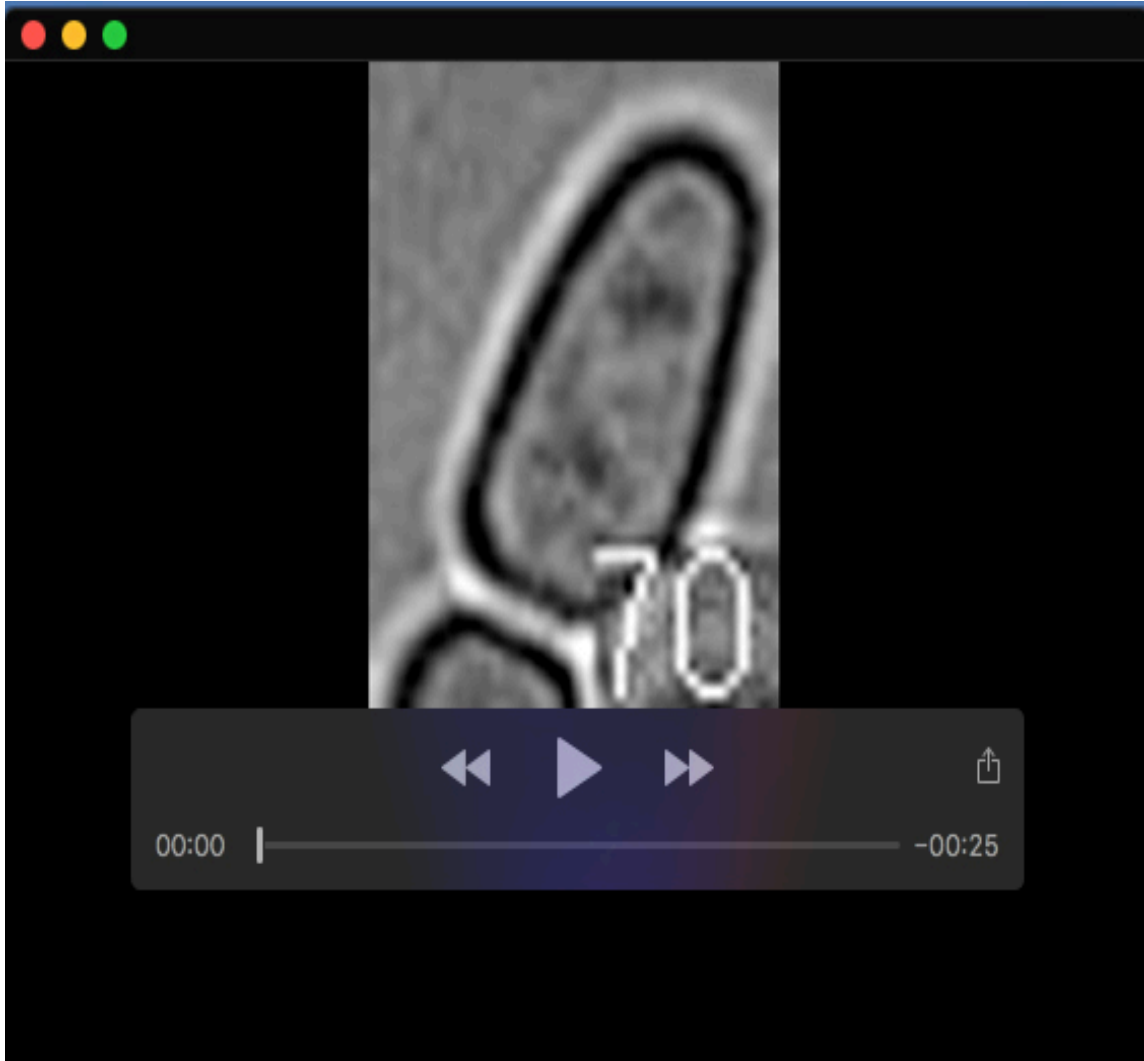

**Movie 2. Time-lapse series of a expanding *pkd2-B42* mutant cell at 37°C.** Number represents time in minutes after the preceding cell separation.

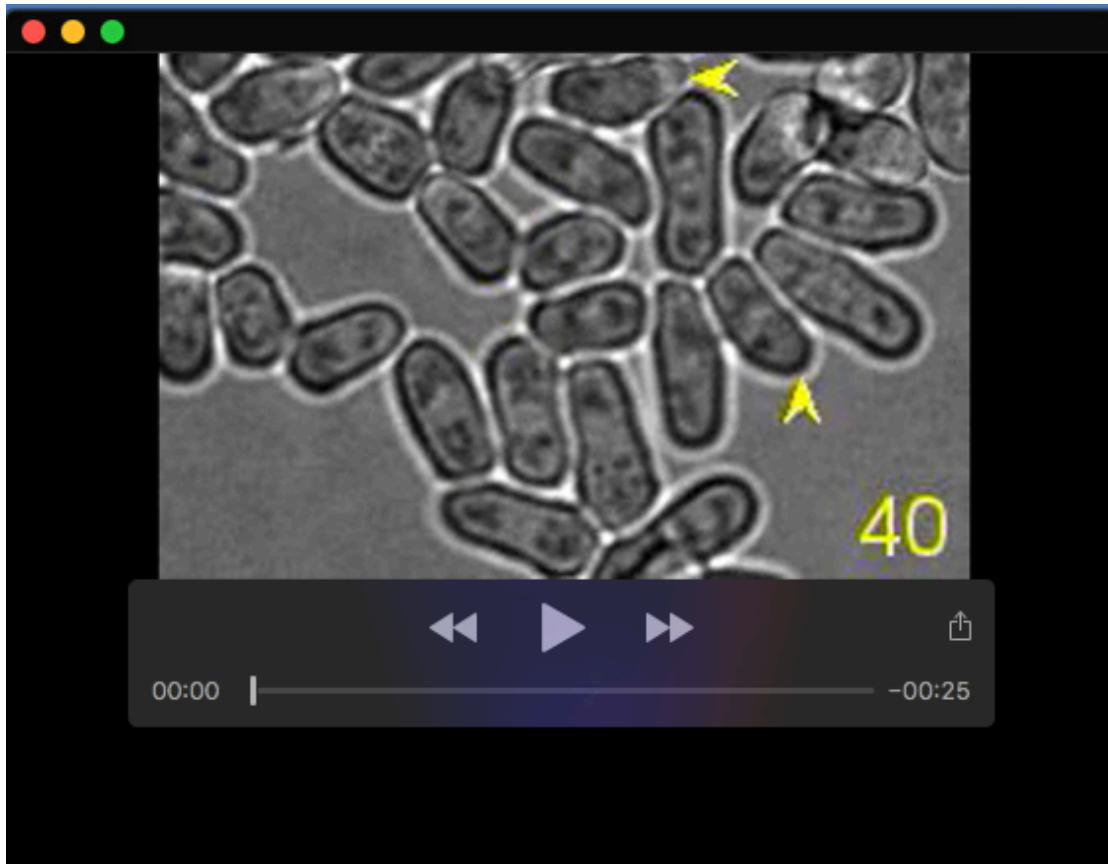

**Movie 3.** Time-lapse series of *pkd2-B42* cells at 37°C. Arrow: The deflating cells. Number represents time in minutes.
